# Supplementary material for: Fetal bradyarrhythmias: classification, monitoring and outcomes of 40 cases at a single center
Source: publisher site journal article supplement (doi:10.1515/jpm-2024-0131), 2024-06-25
Supplement: Supplementary file 1 [file j_jpm-2024-0131_suppl_001.docx]

**SUPPLEMENTAL TABLE**

| **Table. Detailed characteristics of fetuses with fetal bradyarrhythmias** | | | | | | | | | | | |
| --- | --- | --- | --- | --- | --- | --- | --- | --- | --- | --- | --- |
| **Case no** | **GA at diagnosis (weeks)** | **Type of arrhythmia** | **Cardiac/extra cardiac anomaly** | **Maternal rheumatic disease and antibodies with titers** | **Treatment** | **Conversion** | | | **Myocardial dysfunction/ Endocardial fibroelastosis** | **Hydrops** | **Postnatal status** |
| **Yes/No** | **Type** | **Time**  **(weeks)** |  |  |  |
| **1** | 21 | 1°AVB | No | Sjogren  SSA+++/SSB+ | DEXA | Yes | Sinus rhythm | 26 | No/No | No | Sinus rhythm at birth |
| **2** | 23 | 1°AVB | No | SLE  SSA+++ | DEXA | Yes | Sinus rhythm | 25 | No/No | No | Sinus rhythm at birth |
| **3** | 25 | 2°AVB type 2 | No | Sjogren  SSA+++/SSB++ | No | Yes | 2° AVB Type 1 | 35 | No/No | No | 2 ° AVB Type 1 at birth,  Sinus rhythm on Day 8.  Current age: 8 y |
| **4** | 29 | 2° AVB | No | No | No | Yes | Complete AVB | 29 | No/No | No | Complete Av block at birth  Pacemaker + Current age:3.5 |
| **5** | 22 | Sinus bradycardia | No | LQTS | No | No |  |  | No/No | No | LQTS  (ventricular tachycardia) at birth.  Current age: 5 y |
| **6** | 29 | Sinus bradycardia | No | LQTS | No | No |  |  | No/No | No | LQTS  (ventricular tachycardia) at birth  Current age: 3 y |
| **7** | 20 | 3° AVB | No | Sjogren  SSA+++/SSB+ | DEXA+Terbutaline | No |  |  | No/No | No | Complete AVB at birth.  LQTS, enalapril used up to 2 years of age.  Pacemaker implantation at 18 months.  Current age: 6 y |
| **8** | 21 | 3 ° AVB | No | Sjogren  SSA+++/SSB+ | DEXA+Terbutaline | No |  |  | No/No | No | Complete AVB at birth,  Pacemaker implantation at week 1.  Current age: 2 y |
| **9** | 25 | 3° AVB | No | Sjogren  SSA+++/SSB+ | DEXA+Terbutaline | No |  |  | Yes/Yes | No | Complete AVB at birth,  Pacemaker: parental refusal. |
| **10** | 24 | 3° AVB | No | No | DEXA+Terbutaline | No |  |  | No/No | No | Complete AVB at birth,  Died at Day 1 due to cardiac disfunction. |
| **11** | 24 | 3° AVB | No | Sjogren  SSA+++/SSB+ | DEXA+Terbutaline | No |  |  | No/No | No | Complete AVB at birth,  Pacemaker implantation at week 1.  Current age: 2.5y |
| **12** | 23 | 3° AVB | No | Sjogren  SSA+++/SSB+ | DEXA+Terbutaline | Yes | İmprovement in hydrops and ventricular rate | 30 | Yes/No | Yes | Complete AVB at birth,  Pacemaker implantation at week 1.  Current age: 2y |
| **13** | 23 | 3° AVB | No | Sjogren  SSA+++ | DEXA+Terbutaline | No |  |  | No/No | No | Complete AVB at birth,  Pacemaker implantation at week 1.  Current age: 3y |
| **14** | 22 | 3° AVB | No | Sjogren  SSA+++/SSB+ | No | No |  |  | No/No | No | Complete AVB at birth,  Pacemaker implantation at week 1.  Current age: 8y |
| **15** | 29 | Premature ventricular contraction | No | No | No | No |  |  | No/No | No | LQTS at birth. Propranolol used up to 2.5 years of age.  Current age: 4y |
| **16** | 22 | 2° AVB | Rhombencephalosynapsis | No | No | No |  |  | No/No | No | 2. AVB at birth. Sinus bradycardia at Day 8.  HR: 100bpm. Current age: 2.5y |
| **17** | 30 | Sinus bradycardia | Microcephaly, Cerebellar hypoplasia | No | No | No |  |  | No/No | No | Sinus bradycardia at birth.  HR: 100bpm.  Cardiac function: Normal.  Fetal Seckel syndrome. Current age: 2y |
| **18** | 31 | Blocked atrial bradycardia | Multiple cardiac rhabdomyoma | No | No | No |  |  | No/No | No | Blocked atrial trigeminy at birth HR: 110bpm. Propranolol used up to 1 year of age.  Fetal tuberous sclerosis.  Current age: 4y |
| **19** | 25 | Blocked atrial bradycardia | PLSVC | No | No | No |  |  | No/No | No | Sinus rhytm at birth |
| **20** | 19 | 3° AVB | DORV, AVSD, Severe aortic stenosis | No | No | No |  |  | Yes/Yes | Yes | Fetal loss at 22 gestational weeks |
| **21** | 18 | Blocked atrial bradycardia | No | No | No | No |  |  | No/No | No | Blocked atrial bigeminy and SVT attacks after birth. Anti-arrhythmic treatment then sinus rthytm at Day 5. |
| **22** | 31 | Blocked atrial bradycardia | Severe TR and MR, restrictive and aneurysmatic foramen ovale | No | No | Yes | Sinus rhythm,  improvement in hydrops and heart failure | 34 | Yes/No | Yes | Sinus rhythm at birth, Restrictive and aneurysmatic foramen ovale, Mild TR. |
| **23** | 24 | Blocked atrial bradycardia | Ebstein anomaly, severe TR | No | No | No |  |  | Yes/No | Yes | Fetal loss at 30 gestational weeks. |
| **24** | 31 | Sinus bradycardia | No | No | No | No |  |  | No/No | No | Sinus bradycardia at birth,  QTC: 465 msn  Current age: 3.5 y. |
| **25** | 13 | 2° AVB | Left isomerism, AVSD, incompetent AV valve, right stomach | No | No | No |  |  | No/No | Yes | Termination at 15 gestational weeks. |
| **26** | 21 | 3° AVB | Left isomerism, AVSD, PLSVC, incompetent AV valve, dextrocardia | No | No | No |  |  | Yes/No | Yes | Fetal loss at 35 gestational weeks. |
| **27** | 23 | 3° AVB | Left isomerism, AVSD, PLSVC, interruption of IVC, right stomach | No | No | No |  |  | Yes/No | No | Complete AVB at birth.  Pacemaker implantation at 5 months.  Current age: 3.5y. |
| **28** | 19 | 3° AVB | Left isomerism,pes equinovarus | No | No | No |  |  | No/No | Yes | Fetal loss at 28 gestational weeks. |
| **29** | 15 | 3° AVB | Left isomerism, AVSD, DORV, hypertropic CM | No | No | No |  |  | No/No | No | Termination at 20 gestational weeks. |
| **30** | 20 | 3° AVB | Left isomerism, AVSD, DORV, PLSVC, hypertropic Cardiomegaly, right stomach | No | No | No |  |  | Yes/No | Yes | Termination at 29 gestational weeks. |
| **31** | 26 | 3° AVB | Left atrial isomerism, AVSD, hypertropic cardiomegaly, left gallblader | No | No | No |  |  | Yes/No | Yes | Termination at 29 gestational weeks. |
| **32** | 16 | 3° AVB | Left atrial isomerism, AVSD, PA-VSD, hypertropic cardiomegaly omphalocele, right stomach | No | No | No |  |  | No/No | No | Termination at 17 gestational weeks. |
| **33** | 29 | Blocked atrial bradycardia | Right atrial isomerism, AVSD, PLSVC, incompetent AV valve, agenesis of Ductus venosus, right stomach | No | No | No |  |  | Yes/No | Yes | Fetal loss at 36 gestational weeks. |
| **34** | 24 | 3° AVB | Right isomerism | No | No | No |  |  | No/No | No | Neonatal death at Day 1. |
| **35** | 29 | 3° AVB | DILV L-TGA,pes equinovarus | No | No | No |  |  | No/No | No | Complete AVB at birth.  Neonatal death at week 2 due to sepsis. |
| **36** | 28 | 2° AVB | c-TGA | No | No | Yes | 3° AVB | 32 | No/No | No | Complete AVB at birth.  Pacemaker implantation at month 8.  Current age : 1.5y |
| **37** | 35 | 3° AVB | c-TGA | No | No | No |  |  | No/No | No | Complete AVB at birth.  Pacemaker implantation at week 1.  Current age: 5y |
| **38** | 22 | 2° AVB | c-TGA, SUA | No | No | No |  |  | No/No | No | 2° AVB at birth. Pacemaker implantation at week 2.  Death at day 40. |
| **39** | 21 | 2° AVB | No | SLE  SSA+++ | DEXA+Terbutaline | Yes | 3° AVB | 23 | Yes/No | No | Complete AVB at birth.  Pacemaker implantation at week 1. |
| **40** | 27 | 2° AVB | No | No | DEXA | No | Improvement in hydrops | 34 | No/No | Yes | LQTS at birth. Propranolol treatment continues.  Current age: 5 months |
| AVSD: Atrioventricular valve defect, DILV: Double inlet left ventricle, DORV: Double outlet right ventricle, PA-VSD: Pulmonary atresia- ventricular septal defect, c-TGA: Corrected transposition of the great arteries, SVT: Supraventricular tachycardia, TR: Tricuspid valve regurgitation, LQTS: Long-QT syndrome, IVC: Interrupted inferior vena cava, PLSVC: Persistent left superior vena cava, SUA: Single umbilical artery | | | | | | | | | | | |
